# Supplementary material for: Selection and Drift: A Comparison between Historic and Recent Dutch Friesian Cattle and Recent Holstein Friesian Using WGS Data
Source: MDPI journal article supplement (doi:10.3390/ani12030329), 2022-01-29
Supplement: s1 [file s1]

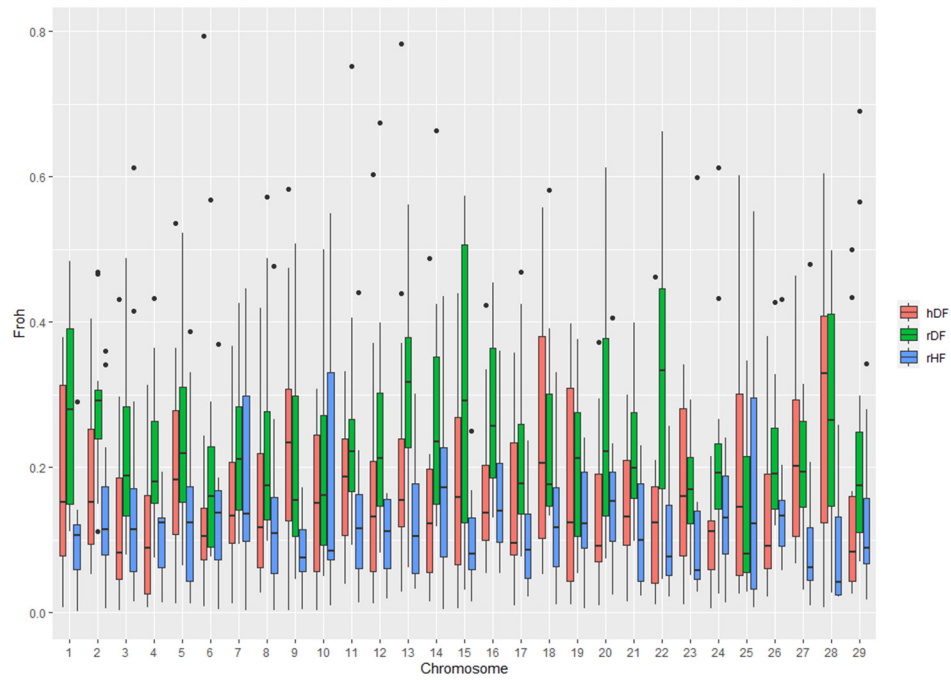

**Figure S1.** Distribution of inbreeding coefficients (Froh) based on runs of homozygosity (ROH) for each chromosome across groups.
