# Supplementary material for: Selection and Drift: A Comparison between Historic and Recent Dutch Friesian Cattle and Recent Holstein Friesian Using WGS Data
Source: MDPI journal article supplement (doi:10.3390/ani12030329), 2022-01-29
Supplement: s1 [file s1]

**Table S2.** Genomic regions with the highest frequency of runs of homozygosity (ROH islands) occurrence across all animals per group.

| Group | BTA | # SNPs | Start bp    | End bp      | Genes                                                                                                                                                                                                            |
|-------|-----|--------|-------------|-------------|------------------------------------------------------------------------------------------------------------------------------------------------------------------------------------------------------------------|
| hDF   | 1   | 675    | 106,645,514 | 106,908,592 | ARL14, ENSBTAG00000049656, ENSBTAG00000049943, PPM1L                                                                                                                                                             |
|       | 7   | 190    | 49,691,470  | 49,900,760  | bta-mir-2459, CDC25C, GFRA3, EGR1, ENSBTAG00000052249, ENSBTAG00000054382, ETF1, FAM53C, HSPA9, KDM3B, REEP2, SLBP2, SNORD63                                                                                     |
|       | 8   | 27     | 61,211,538  | 61,315,643  | ZCCHC7                                                                                                                                                                                                           |
|       | 8   | 19     | 61,393,975  | 61,449,116  | ZCCHC7                                                                                                                                                                                                           |
|       | 11  | 644    | 79,029,348  | 79,282,225  |                                                                                                                                                                                                                  |
|       | 11  | 798    | 99,199,671  | 99,647,165  | bta-mir-12056, CRAT, DOLK, DOLPP1, ENDOG, ENSBTAG00000036099, ENSBTAG00000055215, IER5L, KYAT1, LRRC8A, MIGA2, NUP188, PHYHD1, PKN3, PTPA, SET, SH3GLB2, SPOUT1, TBC1D13, U6, ZDHHC12, ZER1                      |
|       | 14  | 410    | 23,116,668  | 23,409,878  | bta-mir-12050, CHCHD7, CLCN6, ENSBTAG00000045097, ENSBTAG00000049644, ENSBTAG00000051516, ENSBTAG00000053852, ENSBTAG00000054153, KIAA2013, LYN, MFN2, MIIP, MOS, MTHFR, NPPA, NPPB, PLAG1, PLOD1, RPS20, U1, U5 |
|       | 16  | 937    | 41,624,790  | 41,939,418  | AGTRAP                                                                                                                                                                                                           |
|       | 16  | 434    | 41,939,940  | 42,292,997  | AGTRAP, DISP3, DRAXIN, FBXO2, FBXO44, FBXO6, MAD2L2                                                                                                                                                              |
|       | 16  | 250    | 42,299,812  | 42,353,521  | ENSBTAG00000049854                                                                                                                                                                                               |
|       | 18  | 99     | 14,627,147  | 14,842,392  | DBNDD1, DEF8, ENSBTAG00000038051, ENSBTAG00000055124, FANCA, GAS8, MC1R, SPIRE2, TCF25, TUBB3, U1                                                                                                                |
|       | 21  | 350    | 7,412,437   | 7,604,608   | LRRC28, SYNM, TTC23                                                                                                                                                                                              |
|       | 26  | 151    | 506,033     | 691,845     | UBE2D1                                                                                                                                                                                                           |
| rDF   | 1   | 1071   | 99,426,412  | 99,801,506  | GOLIM4, LRRC77, PDCD10, SERPINI1                                                                                                                                                                                 |
|       | 1   | 2073   | 100,958,315 | 101,324,016 |                                                                                                                                                                                                                  |
|       | 1   | 757    | 106,577,808 | 106,908,593 | ARL14, ENSBTAG00000049656, ENSBTAG00000049943, ENSBTAG00000055054, PPM1L                                                                                                                                         |
|       | 1   | 760    | 112,795,420 | 113,163,480 |                                                                                                                                                                                                                  |
|       | 2   | 1227   | 4,280,885   | 4,580,659   | ENSBTAG00000050981, SAP130, UGGT1                                                                                                                                                                                |
|       | 2   | 23     | 72,172,782  | 72,177,543  | ENSBTAG00000019464                                                                                                                                                                                               |
|       | 2   | 932    | 72,226,163  | 72,51,6011  | ENSBTAG00000050089                                                                                                                                                                                               |
|       | 2   | 478    | 106,329,099 | 106,642,920 | BCS1L, CATIP, CNOT9, CTDSP1, MIR26B, PLCD4, PNKD, RNF25, SLC11A1, STK36, USP37, VIL1, ZNF142                                                                                                                     |
|       | 3   | 1363   | 8,713,303   | 9,501,436   | ATP1A4, bta-mir-11983, CASQ1, CD244, CD48, CD84, COPA, DCAF8, ENSBTAG00000010458, ENSBTAG00000015741, ENSBTAG00000051438, ENSBTAG00000052819, LY9, NCSTN, PEA15, PEX19, SLAMF1, SLAMF6, SLAMF7, U6, VANGL2       |

|    |      |             |             |                                                                                                                                                                                                                        |
|----|------|-------------|-------------|------------------------------------------------------------------------------------------------------------------------------------------------------------------------------------------------------------------------|
| 7  | 1116 | 45,793,481  | 46,384,291  | 5S_rRNA, bta-mir-2285di, C7H5orf24, CAMLG, CDKL3, CDKN2AIPNL, DDX46, ENSBTAG00000050332, JADE2, PCBD2, PPP2CA, SAR1B, SEC24A, SKP1, TCF7, TXNDC15, U6, UBE2B                                                           |
| 7  | 505  | 49,393,699  | 49,908,959  | BRD8, bta-mir-2459, CDC23, CDC25C, EGR1, ENSBTAG00000044792, ENSBTAG00000044864, ENSBTAG00000054382, ENSBTAG00000054560, ETF1, FAM13B, FAM53C, GFRA3, HSPA9, KDM3B, KIF20A, NME5, PKD2L2, REEP2, SLBP2, SNORD63, WNT8A |
| 7  | 1018 | 50,027,040  | 50,857,210  | 5S_rRNA, bta-mir-1949, CTNNA1, DNAJC18, ECSCR, ENSBTAG00000004415, ENSBTAG00000046926, LRRTM2, MATR3, MZB1, PAIP2, PROB1, SIL1, SLC23A1, SMIM33, SNORA74, SPATA24, STING1, UBE2D2                                      |
| 7  | 456  | 51,413,326  | 51,746,693  | APBB3, CYSTM1, EIF4EBP3, ENSBTAG00000010871, ENSBTAG00000054857, HBEGF, PFDN1, SLC35A4, SLC4A9, SRA1, U6                                                                                                               |
| 8  | 131  | 61,209,017  | 61,451,866  | ZCCHC7                                                                                                                                                                                                                 |
| 8  | 62   | 72,722,223  | 72,785,824  | DOCK5, GNRH1, KCTD9                                                                                                                                                                                                    |
| 8  | 1880 | 106,084,876 | 106,413,598 | ASTN2                                                                                                                                                                                                                  |
| 10 | 68   | 73,293,126  | 73,321,625  |                                                                                                                                                                                                                        |
| 10 | 371  | 73,333,656  | 73,689,533  | ENSBTAG00000047000, PRKCH, TMEM30B                                                                                                                                                                                     |
| 11 | 1026 | 17,908,878  | 18,189,921  |                                                                                                                                                                                                                        |
| 11 | 603  | 99,298,621  | 99,647,165  | bta-mir-12056, CRAT, DOLK, DOLPP1, ENDOG, ENSBTAG00000036099, ENSBTAG00000055215, IER5L, KYAT1, LRRC8A, MIGA2, NUP188, PHYHD1, PTPA, SH3GLB2, SPOUT1                                                                   |
| 12 | 152  | 59,667,684  | 59,712,947  |                                                                                                                                                                                                                        |
| 13 | 857  | 7,475,527   | 7,750,096   | ENSBTAG00000048850, SEL1L2                                                                                                                                                                                             |
| 13 | 806  | 26,545,252  | 26,904,105  | ENSBTAG00000047440, FZD8, GAD2, GJD4, MYO3A                                                                                                                                                                            |
| 13 | 35   | 48,965,632  | 48,992,476  |                                                                                                                                                                                                                        |
| 14 | 675  | 23,021,556  | 23,409,878  | TMEM68, CHCHD7, ENSBTAG00000045097, ENSBTAG00000054153, LYN, PLAG1, RPS20, TGS1, U1                                                                                                                                    |
| 14 | 1230 | 34,842,119  | 35,402,846  | EYA1                                                                                                                                                                                                                   |
| 14 | 513  | 39,799,617  | 40,153,775  | ZFHX4                                                                                                                                                                                                                  |
| 15 | 541  | 35,159,302  | 35,422,793  | ENSBTAG00000032859, NUCB2, PIK3C2A, RPS13, SNORD14                                                                                                                                                                     |
| 16 | 864  | 25,686,447  | 25,882,406  |                                                                                                                                                                                                                        |
| 16 | 467  | 41,809,486  | 42,007,254  | AGTRAP, bta-mir-12050, CLCN6, DRAXIN, ENSBTAG00000049644, ENSBTAG00000051516, ENSBTAG00000053852, FBXO6, MAD2L2, MTHFR, NPPA, NPPB                                                                                     |
| 16 | 149  | 42,009,038  | 42,171,425  | DISP3, FBXO2, FBXO44, FBXO6                                                                                                                                                                                            |
| 16 | 139  | 42,188,151  | 42,292,997  | DISP3                                                                                                                                                                                                                  |
| 16 | 331  | 44,367,358  | 44,489,927  | CA6, ENSBTAG00000034323                                                                                                                                                                                                |
| 17 | 16   | 34,921,218  | 34,927,099  |                                                                                                                                                                                                                        |

|     |    |      |             |             |                                                                                                                                                                                      |
|-----|----|------|-------------|-------------|--------------------------------------------------------------------------------------------------------------------------------------------------------------------------------------|
|     | 18 | 543  | 14,271,722  | 14,713,902  | ANKRD11, CDH15, CDK10, CHMP1A, CPNE7, DPEP1, ENSBTAG00000042786, ENSBTAG00000054975, FANCA, MC1R, RPL13, SLC22A31, SPATA2L, SPATA33, SPG7, SPIRE2, TCF25, TUBB3, VPS9D1, ZNF276      |
|     | 20 | 1416 | 71,449,101  | 71,891,907  | 5S_rRNA, AHRR, CCDC127, CEP72, ENSBTAG00000026527, ENSBTAG00000052982, EXOC3, LRRC14B, PDCD6, SDHA, SLC9A3, TPPP, U6                                                                 |
|     | 21 | 125  | 851,400     | 1,098,021   |                                                                                                                                                                                      |
|     | 21 | 436  | 2,092,906   | 2,449,109   | bta-mir-11995, ENSBTAG00000048764, ENSBTAG00000052727, ENSBTAG00000053856, SNORD115, SNORD116, UBE3A                                                                                 |
|     | 22 | 509  | 49,798,979  | 50,015,556  | C22H3orf18, CACNA2D2, CYB561D2, NPRL2, RASSF1, ZMYND10                                                                                                                               |
|     | 22 | 469  | 51,519,621  | 51,693,926  | CAMP, CATHL2, CATHL3, CATHL4, CATHL5, CATHL6, CDC25A, ENSBTAG00000016153, ENSBTAG00000031594, ENSBTAG00000039879, ENSBTAG00000052903, NME6                                           |
|     | 24 | 661  | 30,824,756  | 31,056,263  | ENSBTAG00000050912                                                                                                                                                                   |
|     | 24 | 49   | 3,1057,360  | 31,121,134  |                                                                                                                                                                                      |
|     | 26 | 582  | 16,337      | 719,883     | ENSBTAG00000046109, ENSBTAG00000055208, OR5D18, UBE2D1                                                                                                                               |
|     | 26 | 1029 | 22,459,087  | 23,130,149  | 5S_rRNA, ACTR1A, ARMH3, bta-mir-146b, CUEDC2, ELOVL3, ENSBTAG00000051094, FBXL15, FGF8, GBF1, HPS6, KCNIP2, LDB1, MFSD13A, NFKB2, NOLC1, NPM3, OGA, PITX3, PPRC1, PSD, SNORD22, SUFU |
|     | 26 | 697  | 41,573,150  | 41,879,622  | ATE1, ENSBTAG00000048561, ENSBTAG00000049142, NSMCE4A, TACC2                                                                                                                         |
| rHF | 8  | 1451 | 105,893,347 | 106,205,184 | ASTN2                                                                                                                                                                                |
|     | 8  | 654  | 106,207,079 | 106,324,101 | ASTN2                                                                                                                                                                                |
|     | 14 | 536  | 22,787,828  | 22,887,796  | XKR4                                                                                                                                                                                 |
|     | 14 | 17   | 22,999,212  | 23,004,758  |                                                                                                                                                                                      |
|     | 16 | 516  | 44,888,195  | 45,091,226  | bta-mir-2285ck, RERE, SLC45A1                                                                                                                                                        |
|     | 19 | 551  | 52,312,182  | 52,611,649  | CARD14, CCDC40, EIF4A3, ENSBTAG00000017233, ENSBTAG00000030186, ENSBTAG00000053071, GAA, Metazoa_SRP, SGSH, SLC26A11, TBC1D16                                                        |
|     |    |      |             |             |                                                                                                                                                                                      |
