# Supplementary material for: Selection and Drift: A Comparison between Historic and Recent Dutch Friesian Cattle and Recent Holstein Friesian Using WGS Data
Source: MDPI journal article supplement (doi:10.3390/ani12030329), 2022-01-29
Supplement: s1 [file s1]

**Table S1.** Differentiated genomic regions (ZFst > 8) across autosomal chromosomes for the hDF versus rDF population, the hDF versus rHF population and the rDF versus rHF population

| Group   | BTA | Start bp    | End bp      | #<br>SNPs | Weighted<br>Fst | Mean Fst | ZFst     |
|---------|-----|-------------|-------------|-----------|-----------------|----------|----------|
| hDF-rDF | 1   | 19,240,001  | 19,280,000  | 137       | 0.31568         | 0.28208  | 8.11830  |
|         | 1   | 19,260,001  | 19,300,000  | 124       | 0.31381         | 0.27870  | 8.01900  |
|         | 1   | 53,460,001  | 53,500,000  | 87        | 0.36497         | 0.29305  | 8.44001  |
|         | 1   | 96,340,001  | 96,380,000  | 217       | 0.44682         | 0.27948  | 8.04180  |
|         | 1   | 96,500,001  | 96,540,000  | 265       | 0.44624         | 0.39731  | 11.49949 |
|         | 1   | 96,520,001  | 96,560,000  | 227       | 0.46864         | 0.42164  | 12.21353 |
|         | 1   | 96,540,001  | 96,580,000  | 223       | 0.47283         | 0.40570  | 11.74590 |
|         | 1   | 96,560,001  | 96,600,000  | 172       | 0.37235         | 0.29707  | 8.55815  |
|         | 1   | 98,780,001  | 98,820,000  | 118       | 0.39176         | 0.33638  | 9.71162  |
|         | 1   | 98,800,001  | 98,840,000  | 202       | 0.49627         | 0.45689  | 13.24799 |
|         | 1   | 98,820,001  | 98,860,000  | 157       | 0.51724         | 0.44645  | 12.94163 |
|         | 1   | 101,260,001 | 101,300,000 | 194       | 0.35024         | 0.28333  | 8.15487  |
|         | 2   | 72,180,001  | 72,220,000  | 183       | 0.39509         | 0.32438  | 9.35949  |
|         | 2   | 72,540,001  | 72,580,000  | 93        | 0.49024         | 0.40873  | 11.83473 |
|         | 2   | 72,560,001  | 72,600,000  | 91        | 0.54348         | 0.51100  | 14.83587 |
|         | 2   | 72,580,001  | 72,620,000  | 48        | 0.50611         | 0.40961  | 11.86037 |
|         | 2   | 72,640,001  | 72,680,000  | 22        | 0.35211         | 0.28085  | 8.08215  |
|         | 2   | 75,800,001  | 75,840,000  | 314       | 0.43258         | 0.37650  | 10.88895 |
|         | 2   | 75,820,001  | 75,860,000  | 346       | 0.44958         | 0.39025  | 11.29253 |
|         | 2   | 129,340,001 | 129,380,000 | 253       | 0.38533         | 0.31834  | 9.18231  |
|         | 2   | 129,360,001 | 129,400,000 | 179       | 0.37822         | 0.30326  | 8.73970  |
|         | 3   | 79,120,001  | 79,160,000  | 60        | 0.36410         | 0.30461  | 8.77946  |
|         | 5   | 51,480,001  | 51,520,000  | 254       | 0.50590         | 0.32407  | 9.35045  |
|         | 5   | 51,500,001  | 51,540,000  | 193       | 0.50249         | 0.36656  | 10.59733 |
|         | 5   | 51,520,001  | 51,560,000  | 141       | 0.44374         | 0.34914  | 10.08609 |
|         | 5   | 92,080,001  | 92,120,000  | 170       | 0.39627         | 0.29265  | 8.42836  |
|         | 7   | 101,560,001 | 101,600,000 | 238       | 0.34233         | 0.27871  | 8.01918  |
|         | 11  | 82,960,001  | 83,000,000  | 57        | 0.36766         | 0.33488  | 9.66752  |
|         | 12  | 74,100,001  | 74,140,000  | 351       | 0.31689         | 0.29052  | 8.36591  |
|         | 13  | 47,680,001  | 47,720,000  | 193       | 0.36615         | 0.28172  | 8.10751  |
|         | 13  | 47,700,001  | 47,740,000  | 110       | 0.41587         | 0.35078  | 10.13427 |
|         | 13  | 47,720,001  | 47,760,000  | 76        | 0.41434         | 0.35157  | 10.15734 |
|         | 13  | 47,740,001  | 47,780,000  | 54        | 0.40885         | 0.32184  | 9.28501  |
|         | 13  | 47,760,001  | 47,800,000  | 122       | 0.43150         | 0.34788  | 10.04914 |
|         | 13  | 47,780,001  | 47,820,000  | 218       | 0.41812         | 0.28201  | 8.11607  |
|         | 17  | 49,540,001  | 49,580,000  | 304       | 0.36116         | 0.29127  | 8.38786  |
|         | 17  | 49,560,001  | 49,600,000  | 276       | 0.38671         | 0.34291  | 9.90312  |
|         | 20  | 33,400,001  | 33,440,000  | 254       | 0.31833         | 0.28849  | 8.30643  |
| hDF-rHF | 4   | 44,660,001  | 44,700,000  | 280       | 0.67762         | 0.58235  | 8.58204  |
|         | 4   | 44,680,001  | 44,720,000  | 230       | 0.67566         | 0.58614  | 8.64437  |
|         | 8   | 69,680,001  | 69,720,000  | 142       | 0.68894         | 0.57327  | 8.43257  |
|         | 11  | 9100,,001   | 9,140,000   | 274       | 0.68436         | 0.57653  | 8.48624  |

|         |    |             |             |     |         |         |         |
|---------|----|-------------|-------------|-----|---------|---------|---------|
|         | 16 | 9,880,001   | 9,920,000   | 374 | 0.62138 | 0.56617 | 8.31578 |
|         | 16 | 73,540,001  | 73,580,000  | 177 | 0.65779 | 0.55323 | 8.10270 |
|         | 19 | 55,020,001  | 55,060,000  | 195 | 0.70326 | 0.58081 | 8.55658 |
|         | 20 | 49,720,001  | 49,760,000  | 334 | 0.74010 | 0.57479 | 8.45753 |
|         | 28 | 15,160,001  | 15,200,000  | 104 | 0.68975 | 0.55687 | 8.16272 |
| rDF-rHF | 1  | 101,260,001 | 101,300,000 | 209 | 0.83254 | 0.62961 | 8.29086 |
|         | 16 | 9,880,001   | 9,920,000   | 374 | 0.74811 | 0.68746 | 9.14869 |
|         | 20 | 28,840,001  | 28,880,000  | 125 | 0.74263 | 0.61200 | 8.02983 |
|         | 22 | 52,800,001  | 52,840,000  | 264 | 0.79243 | 0.65628 | 8.68630 |
|         | 22 | 52,820,001  | 52,860,000  | 308 | 0.79564 | 0.69629 | 9.27954 |
|         | 22 | 52,840,001  | 52,880,000  | 298 | 0.76699 | 0.67055 | 8.89788 |
|         | 24 | 44,160,001  | 44,200,000  | 213 | 0.76937 | 0.63128 | 8.31567 |
